# Supplementary material
Source: MDPI journal article supplement (https://www.mdpi.com/2073-4395/10/7/1039)

## Supplementary Materials

# Recovery of Phosphorus from Waste Water Profiting from Biological Nitrogen Treatment: Upstream, Concomitant or Downstream Precipitation Alternatives

Albert Magrí <sup>1,\*</sup>, Mar Carreras-Sempere <sup>2</sup>, Carmen Biel <sup>2</sup> and Jesús Colprim <sup>1</sup>

<sup>1</sup> LEQUIA, Institute of the Environment, University of Girona, Campus Montilivi, Carrer Maria Aurèlia Capmany 69, E-17003 Girona, Catalonia, Spain; jesus.colprim@udg.edu

<sup>2</sup> IRTA, Institute of Agrifood Research and Technology, Sustainable Plant Protection Program, Ctra. de Cabrils, km 2, E-08348 Cabrils (Barcelona), Catalonia, Spain; mar.carreras@irta.cat (M.C.-S.); carmen.biel@irta.cat (C.B.)

\* Correspondence: albert.magri@udg.edu; albert.magri@gmail.com; Tel.: +34-972-419-542

Received: 19 June 2020; Accepted: 14 July 2020; Published: 18 July 2020

**Table S1.** Relevant words included (or discarded) in the multi-term topic search assessed via the Web of Science Core Collection (Clarivate Analytics, USA).

| Topic                             | Words                                                                                                                                                                                                                                                                                                                                                                                                                                                                                                                                                                                           |
|-----------------------------------|-------------------------------------------------------------------------------------------------------------------------------------------------------------------------------------------------------------------------------------------------------------------------------------------------------------------------------------------------------------------------------------------------------------------------------------------------------------------------------------------------------------------------------------------------------------------------------------------------|
| <i>Included</i>                   | <i>Included</i>                                                                                                                                                                                                                                                                                                                                                                                                                                                                                                                                                                                 |
| Core element under study          | "ortho-phosphate*" OR "orthophosphate*" OR "phosphate*" OR "phosphorous" OR "phosphorus"                                                                                                                                                                                                                                                                                                                                                                                                                                                                                                        |
| Management strategy               | "*recover*" OR "recycl*"                                                                                                                                                                                                                                                                                                                                                                                                                                                                                                                                                                        |
| Technological process             | "crystal*" OR "formation" OR "*minerali*" OR "precipitat*" OR "production"                                                                                                                                                                                                                                                                                                                                                                                                                                                                                                                      |
| Product formed                    | "*apatite*" OR "bobierrite" OR "brushite" OR "monenite" OR "newberyite" OR "*struvit*" OR "vivianite"                                                                                                                                                                                                                                                                                                                                                                                                                                                                                           |
| By-products to be processed       | "biosolid*" OR "centrate*" OR "digestate*" OR "dung" OR "effluent*" OR "filtrate*" OR "leachate*" OR "liquor*" OR "manure" OR "residu*" OR "sewage" OR "sludge*" OR "slurr*" OR "stream*" OR "supernatant*" OR "urine" OR "waste*" OR "WWTP*"                                                                                                                                                                                                                                                                                                                                                   |
| <i>Discarded</i>                  | <i>Discarded</i>                                                                                                                                                                                                                                                                                                                                                                                                                                                                                                                                                                                |
| P-related chemicals and compounds | "acetyl phosph*" OR "*adenosin*" OR "*alanin*" OR "arginine phosph*" OR "carbonate apatite*" OR "cellulose phosphate" OR "chloro-phosph*" OR "dinucleotide*" OR "fluorophosphoric" OR "hypoxanthine*" OR "ketone*" OR "lipid-phosphate" OR "molybdopho*" OR "monobasic potassium phosphate" OR "nitrophosphate" OR "organo-phosph*" OR "organophosph*" OR "pentose phosph*" OR "peptide" OR "phosphate-buffered" OR "phosphate buffer" OR "phosphate cement*" OR "phosphate ceramic*" OR "phosphate group*" OR "phosphate transporter*" OR "*phosphine*" OR "*phosphinite*" OR "*phosphite*" OR |

|                                                                   |                                                                                                                                                                                                                                                                                                                                                                                                                                                                                                                                                                                                                                                                                                                                                                                                                                                                                                                                                                                                                               |
|-------------------------------------------------------------------|-------------------------------------------------------------------------------------------------------------------------------------------------------------------------------------------------------------------------------------------------------------------------------------------------------------------------------------------------------------------------------------------------------------------------------------------------------------------------------------------------------------------------------------------------------------------------------------------------------------------------------------------------------------------------------------------------------------------------------------------------------------------------------------------------------------------------------------------------------------------------------------------------------------------------------------------------------------------------------------------------------------------------------|
|                                                                   | <p>"phosphogypsum" OR "*phosphomannos*" OR "phosphomolyb*" OR "*phosphonate*" OR "*phosphopeptid*" OR "phosphoric ester" OR "*phosphorite*" OR "phosphoryl" OR "*phosphoserin*" OR "pyridoxal" OR "pyrophosphate" OR "sulphonate" OR "tributyl phosphate*" OR "tricresyl phosphate*"</p>                                                                                                                                                                                                                                                                                                                                                                                                                                                                                                                                                                                                                                                                                                                                      |
| Biomedical studies                                                | <p>"analgesic*" OR "antibiotic*" OR "antibod*" OR "antigenic*" OR "arthritis" OR "blood" OR "*bone*" OR "calculi" OR "cancer*" OR "cartilage*" OR "catheter*" OR "cisplatin" OR "*clampsia" OR "clinical*" OR "coronary" OR "cortisol" OR "creatine*" OR "crystalluria" OR "cystoplast*" OR "cytophatic" OR "dental" OR "dentin*" OR "disease*" OR "disinfect*" OR "enamel*" OR "endocrine" OR "fetal" OR "heart*" OR "hepatitis" OR "holmium" OR "immunoassa*" OR "implant*" OR "inflammator*" OR "inositol" OR "kidney*" OR "*kinase*" OR "laser-induced damage" OR "lincomycin" OR "lithostatine" OR "liver*" OR "loperamide" OR "lung*" OR "lysozyme*" OR "mammal*" OR "mammary-gland" OR "mucos*" OR "mutagen*" OR "nephro*" OR "nucleotide*" OR "orthopaedic*" OR "pericardium" OR "*polyoma" OR "precipitation of protein*" OR "prostat*" OR "*protease*" OR "renal*" OR "salivar*" OR "*stanniet*" OR "*synaptic*" OR "tendinopath*" OR "testosterone" OR "therap*" OR "tooth" OR "urolithiasis" OR "urothelial*"</p> |
| Natural history, ecosystems, mineralogy and other related studies | <p>"archaeobotany" OR "archaeologist*" OR "amphibian*" OR "*antarctic*" OR "boreal" OR "chlorspodioside" OR "diamond*" OR "lentic ecosystem*" OR "lotic ecosystem*" OR "magma*" OR "metamorphism" OR "mimetite" OR "paleocen*" OR "prehistoric*" OR "pollen" OR "*pyrite*" OR "riparian" OR "*silicate*" OR "soil structure"</p>                                                                                                                                                                                                                                                                                                                                                                                                                                                                                                                                                                                                                                                                                              |
| Radioactivity and chemical studies                                | <p>"actinide*" OR "antimony" OR "barium" OR "cesium" OR "erbium" OR "fission" OR "lanthanide*" OR "lanthanum" OR "lithium" OR "neodymium" OR "nuclear waste*" OR "plutonium" OR "production of HF" OR "radioactive material*" OR "radioactive waste*" OR "radionuclide*" OR "scandium" OR "strontium" OR "technogenic waste*" OR "thorium" OR "uranium" OR "vanadium"</p>                                                                                                                                                                                                                                                                                                                                                                                                                                                                                                                                                                                                                                                     |
| Alternative P management alternatives                             | <p>((("4-phosphate" OR "6-phosphate" OR "adsorbent*" OR "agricultur*" OR "Al and Fe" OR "Al/Fe" OR "Al:Fe" OR "*alkanoate*" OR "alum*" OR "ash*" OR "BNR" OR "clogging" OR "*coagula*" OR "combustion*" OR "electrodialy*" OR "Fe and Al" OR "fertili*" OR "*floccul*" OR "incinerat*" OR "ion exchange" OR "iron*" OR "membrane*" OR "osmosis" OR "P removal" OR "phosphate discharge*" OR "phosphate removal" OR "phosphorous discharge*" OR "phosphorus discharge*" OR "phosphorous removal" OR "phosphorus removal" OR "polyphosphate*" OR "removal of phosphate*" OR "removal of phosphorous" OR "removal of phosphorus" OR "scale" OR "scaling" OR "soil*" OR "*sorption*" OR "sediment*" OR "wetland*")) NOT ("apatite*" OR "bobierrite" OR "brushite" OR "calci*" OR "magnesi*" OR "monenite" OR</p>                                                                                                                                                                                                                  |

"newberyite" OR "recover\*" OR "\*struvit\*" OR "vivianite")) OR  
 "alumina recovery" OR "EBPR recovery" OR "phytoremediation" OR  
 "production of available phosphorus from rock phosphate" OR  
 "recovered by backwashing" OR "recovering alloy steels" OR  
 "recovery of normal operation" OR "rhizofiltrat\*"

Others  
 "cheese quality" OR "D2EHFA" OR "DBDECMP" OR "flame" OR  
 "glass-ceramics" OR "LDH" OR "LUKE" OR "parenteral  
 nutrition" OR "resilon" OR "silicon" OR "thermal ionization" OR  
 "titanium" OR "u-th-ra" OR "water-ethanol"

**Table S2.** Summary of experiences integrating chemical precipitation aiming at P recovery followed by biological N oxidation, or removal (upstream precipitation).

| Waste water source <sup>1</sup>                                                                                                                  | Precipitation performance <sup>2</sup>                                                                                                                                                                                                                                                                                                                         | Bioprocess performance                                                                                                                                                                                                                                                                   | Precipitate characteristics                                                                                                                                  | Reference |
|--------------------------------------------------------------------------------------------------------------------------------------------------|----------------------------------------------------------------------------------------------------------------------------------------------------------------------------------------------------------------------------------------------------------------------------------------------------------------------------------------------------------------|------------------------------------------------------------------------------------------------------------------------------------------------------------------------------------------------------------------------------------------------------------------------------------------|--------------------------------------------------------------------------------------------------------------------------------------------------------------|-----------|
| <i>NDN as the bioprocess following chemical P precipitation</i>                                                                                  |                                                                                                                                                                                                                                                                                                                                                                |                                                                                                                                                                                                                                                                                          |                                                                                                                                                              |           |
| Hydrolysed urine<br><br>Composition:<br>pH 9.1, ALK 19692, COD 5868, TN 5280, NH <sub>4</sub> <sup>+</sup> -N 5193, TP 280, Mg & Ca not detected | MgP precipitated in lab tests simultaneously to vacuum thermal stripping (+acid absorption) at 25–65°C using MgCl <sub>2</sub><br><br>3 h batch stripping tests at 60°C and 21.3 kPa → 80% infl. N recovery; solids produced: 25.3 g/L <sub>urine</sub> [(NH <sub>4</sub> ) <sub>2</sub> SO <sub>4</sub> + NH <sub>4</sub> HSO <sub>4</sub> : 85.5 + 13.9 wt%] | NDN via nitrite in a continuous-flow AS AO MBR (2.4 L)<br><br>Increased COD/N (4.7) and ALK/NH <sub>4</sub> <sup>+</sup> -N (4.4) mass ratios after precipitation favoured NDN<br><br>NLR 0.37 g N L <sup>-1</sup> d <sup>-1</sup> , NRE >80%; higher efficiency limited by ALK shortage | MgP mostly precipitated as MAP (>90 wt%) according to XRD and chemical analysis of the solid<br><br>Composition of the precipitate: 13.1% P, 8.2% Mg, 5.3% N | [68]      |
|                                                                                                                                                  | Mg/P adjusted to 1.2/1 → PUE >95%; solids produced: 1.5 g/L <sub>urine</sub>                                                                                                                                                                                                                                                                                   | Global performance: >95% N and P reduction                                                                                                                                                                                                                                               |                                                                                                                                                              |           |
| Anaerobically digested sludge dewatering centrate from a municipal WWTP                                                                          | MgP precipitated in a lab batch reactor (3.5 L)<br><br>MgCl <sub>2</sub> added, pH 8.5 (NaOH), reaction time 10 min<br><br>16% NH <sub>4</sub> <sup>+</sup> and 73% PO <sub>4</sub> separated;                                                                                                                                                                 | Nitrification in a fixed-film aerated reactor (0.4 L), denitrification in a MFC-cathode (0.1 L); MFC-anode fed with raw waste water (270 mg COD L <sup>-1</sup> )<br><br>NRE 52%; power generation 0.3                                                                                   | No data available for the precipitate                                                                                                                        | [105]     |

|                                                                                                                            | effluent with TN<br>1530 mg L <sup>-1</sup>                                                                                                                                                        | mW/m <sup>2</sup> –ref.<br>anodic surface–                                                                                                                |                                                                                                  |       |
|----------------------------------------------------------------------------------------------------------------------------|----------------------------------------------------------------------------------------------------------------------------------------------------------------------------------------------------|-----------------------------------------------------------------------------------------------------------------------------------------------------------|--------------------------------------------------------------------------------------------------|-------|
| Anaerobic lagoon digester supernatant in a swine farm                                                                      | MgP precipitated in lab batch tests (in beakers)                                                                                                                                                   | NDN in a SBR (4.5 L); pH adjusted to 7.0 (influent)                                                                                                       | MgP precipitated mostly as MAP according to XRD and SEM-EDS                                      | [106] |
| Composition: pH 8.1, COD 266, TN 607, NH <sub>4</sub> <sup>+</sup> -N 598, PO <sub>4</sub> -P 22, Mg 31                    | Raw vs. (organically) fermented superphosphate fertiliser [Ca(H <sub>2</sub> PO <sub>4</sub> ) <sub>2</sub> ] used as P source; fermentation increased 15% water-soluble P and provided extra bCOD | COD/TN mass ratio raised (0.4 → 1.8) by adding fermented superphosphate favouring NDN (COD 598, NH <sub>4</sub> <sup>+</sup> -N 328, mg L <sup>-1</sup> ) | Effectiveness of the precipitate as fertiliser demonstrated in a pot test (increased crop yield) |       |
|                                                                                                                            | MgSO <sub>4</sub> supplied at pH 9.0 (NaOH), reaction time 30 min; process optimisable at pH 9.5                                                                                                   | NRE 71% (lower if fermented superphosphate not used)                                                                                                      |                                                                                                  |       |
|                                                                                                                            | 41–50% (up to 55%) NH <sub>4</sub> <sup>+</sup> separated                                                                                                                                          | Global performance: 72% COD, 89% N and 98% P reduction                                                                                                    |                                                                                                  |       |
| Side-stream sludge fermenter effluent from an EBPR system treating low-strength synthetic waste water                      | CaP precipitated in a SBR at 20°C                                                                                                                                                                  | EBPR in a continuous-flow AS A <sup>2</sup> O system (10 L), HRT 0.5 d                                                                                    | Composition of the precipitate: 13.8% P                                                          | [107] |
| Composition of synthetic waste water: pH 7.0–8.0, COD 340, TN 48, NH <sub>4</sub> <sup>+</sup> -N 23, PO <sub>4</sub> -P 7 | Ca(OH) <sub>2</sub> added at pH 10                                                                                                                                                                 | Fermentation of purged sludge followed by precipitation of released P lead to improved simultaneous P uptake and N removal in the mainstream (NRE 80%)    |                                                                                                  |       |
|                                                                                                                            | PUE >99% (65% influent P recovered)                                                                                                                                                                |                                                                                                                                                           |                                                                                                  |       |
| Urine                                                                                                                      | PO <sub>4</sub> precipitated in a lab stirred system using RO brine (from a reclaimed WWTP in a thermal power                                                                                      | NDN via nitrite in a continuous-flow AS AO MBR (10.4 L); influent COD 2500–4000, TN 1800–3200, mg L <sup>-1</sup> ; HRT 2 d                               | Precipitates produced at different brine/urine mixture ratios (0/1–1/1) with 10–15% P            | [108] |
| Composition: pH 6.2–7.9, TN 4670–7630, NH <sub>4</sub> <sup>+</sup> -N 315–2250, TP 330–                                   |                                                                                                                                                                                                    |                                                                                                                                                           |                                                                                                  |       |

|                                                                                                                                                                                                                         |                                                                                                                                                                                                                                                                                                                                                                                                                                                                                                                                                                                                                                                                                     |                                                                                                                                                                                                                                                                                                                                                                                                                                          |                                                                                                                                                                                                                          |       |
|-------------------------------------------------------------------------------------------------------------------------------------------------------------------------------------------------------------------------|-------------------------------------------------------------------------------------------------------------------------------------------------------------------------------------------------------------------------------------------------------------------------------------------------------------------------------------------------------------------------------------------------------------------------------------------------------------------------------------------------------------------------------------------------------------------------------------------------------------------------------------------------------------------------------------|------------------------------------------------------------------------------------------------------------------------------------------------------------------------------------------------------------------------------------------------------------------------------------------------------------------------------------------------------------------------------------------------------------------------------------------|--------------------------------------------------------------------------------------------------------------------------------------------------------------------------------------------------------------------------|-------|
| 654, PO <sub>4</sub> -P 283–585, Mg 31–65, Ca 68–128                                                                                                                                                                    | plant) as Me ions source at 20°C<br><br>Brine/urine mixture adjusted to 1/1 vol., pH 9.0 (with NaOH), reaction time 30 min<br><br>PUE >90%                                                                                                                                                                                                                                                                                                                                                                                                                                                                                                                                          | NRE 45% (with internal COD), increased to 92% when using methanol as external COD source<br><br>Global performance: >90% COD, N and >99% P reduction                                                                                                                                                                                                                                                                                     | Depending on the amount of brine added (Mg+Ca/P molar ratio 0.2–2.3), Mg in the solid decreased from 7 to 2.5%, and Ca raised from 8 to 25%<br><br>Low K, Na and Si content (sum <5%); no hazardous compounds (e.g. HMs) |       |
| Ultrafiltered permeate from an(aerobically) digested sludge dewatering centrate in a municipal WWTP<br><br>Composition: pH 8.8, COD 2694, TN 2024, NH <sub>4</sub> <sup>+</sup> -N 1717, TP 420, PO <sub>4</sub> -P 326 | MgP precipitated in lab batch tests (in beakers) at 20°C<br><br>Mg/NH <sub>4</sub> /PO <sub>4</sub> adjusted with MgCl <sub>2</sub> + K <sub>2</sub> HPO <sub>4</sub> , pH increased with NaOH, reaction time 2 min, MgP deposits used as seeding material<br><br>Mg/NH <sub>4</sub> /PO <sub>4</sub> adjusted to 1.0/1.0/1.0 and pH to 9, 65% NH <sub>4</sub> <sup>+</sup> and 95% PO <sub>4</sub> separated<br><br>Mg and PO <sub>4</sub> supply favoured NH <sub>4</sub> <sup>+</sup> separation; addition of seeding material did not enhance N & P precipitation efficiency (but favoured chemical sludge settling); presence of HMs could negatively affect MAP precipitation | NDN in a continuous-flow AS A <sup>2</sup> O system (24 L) (+settler) for treating raw sewage plus MgP precipitation effluent<br><br>Mixing of precipitation effluent with raw sewage decreased COD and N removal efficiency<br><br>NLR >0.13 g NH <sub>4</sub> <sup>+</sup> -N L <sup>-1</sup> d <sup>-1</sup> (mixture ratio >1/1 vol.) triggered NO <sub>2</sub> <sup>-</sup> accumulation (hypothesised by nitrification inhibition) | MgP precipitated mostly as MAP according to XRD<br><br>Quality of the MgP precipitated potentially compromised by the HM content                                                                                         | [109] |
| Urine-seawater mixture                                                                                                                                                                                                  | PO <sub>4</sub> precipitated in a lab continuous-flow reactor (0.84 L) incl. a                                                                                                                                                                                                                                                                                                                                                                                                                                                                                                                                                                                                      | Nitrification in a continuously aerated SBR (for subsequent in-                                                                                                                                                                                                                                                                                                                                                                          | MgP precipitated mostly as MAP according to XRD and chemical                                                                                                                                                             | [110] |

|                                                                                                                                                                      |                                                                                                                                                                                                                                                                                                                     |                                                                                                                                                                                                                                                                                                                                                                                                                |                                                                                                                                                                                                                                                                                 |           |
|----------------------------------------------------------------------------------------------------------------------------------------------------------------------|---------------------------------------------------------------------------------------------------------------------------------------------------------------------------------------------------------------------------------------------------------------------------------------------------------------------|----------------------------------------------------------------------------------------------------------------------------------------------------------------------------------------------------------------------------------------------------------------------------------------------------------------------------------------------------------------------------------------------------------------|---------------------------------------------------------------------------------------------------------------------------------------------------------------------------------------------------------------------------------------------------------------------------------|-----------|
| Composition (depending on the mixture ratio, 25–50% urine): pH 6.6–6.7, TN 1750–3470, $\text{NH}_4^+$ -N 143–462, TP 104–187, Mg 545–826, Ca 274–374                 | concentric cylinder differentiating hydrolysis-precipitation zone and settling-separation zone<br><br>PUE >91% regardless HRTs (1.5–6 h) and urine mixture ratio (25–50%); P recovery enhanced with HRT and urine fraction; effluent with <10 mg TP/L<br><br>Urea hydrolysis almost completed in all cases (84–94%) | sewer denitrification) with 25% urine fraction<br><br>ALK added as $\text{NaHCO}_3$ based on pH set-point<br><br>Complete nitrification albeit high $\text{Cl}^-$ (13 g $\text{L}^{-1}$ )<br><br>4–5 mg P $\text{g}^{-1}$ $\text{NH}_4^+$ oxidised needed for stable nitrification (when necessary achieved by ~1% urine bypass)<br><br>NLR 0.75 g $\text{L}^{-1} \text{d}^{-1}$ , NCE 90% ( $\text{NH}_4^+$ ) | analysis of the solid formed; calcite also detected; higher purity MAP obtained with higher urine content<br><br>Precipitate with similar $\text{NH}_4^+/\text{P}$ (0.8), Mg/P and Ca/P molar ratios (Mg/P slightly greater than $\text{NH}_4^+/\text{P}$ ); Mg+Ca/P of 1.5–2.0 |           |
| Low-strength synthetic waste water<br><br>Composition: pH 6.4, COD 250–325, TN 60–75, $\text{NH}_4^+$ -N 45–55, $\text{PO}_4$ -P 10–12, Mg 22*, Ca 12* (*calculated) | MgP precipitated in a lab FBR (9.5 L) at 20°C<br><br>pH adjusted with NaOH (7.5 → 9.5); $\text{PO}_4$ separation improved from 43% to 94%<br><br>At pH 9 and HRT 2h; >80% $\text{PO}_4$ and <40% $\text{NH}_4^+$ (<30% COD) separated<br><br>pH 9.5 favoured $\text{NH}_3$ loss from FBR                            | NDN in a MBR (8.4 L) intermittently aerated<br><br>P-recovery in FBR enhanced SND and COD, $\text{NH}_4^+$ and $\text{PO}_4$ removal in MBR (NRE 99%, PUE 93% at pH 9, HRT 6 h and aeration on/off 45/15 min); final effluent with <1 mg $\text{PO}_4$ -P/L<br><br>Membrane fouling was mitigated when the FBR-MBR system run at optimal conditions                                                            | MgP precipitate mostly as MAP according to XRD and SEM-EDS<br><br>Precipitate with molar ratios of Mg/P 1.1 and Ca/P 5 $10^{-3}$<br><br><i>Anhydrous</i> precipitate with 23.5% P, 19.8% Mg, 0.5% K, 0.1% Ca (EDS analysis reported as not sensible to N)                       | [111]     |
| Low-strength synthetic waste water<br><br>Composition: COD 250–300, $\text{NH}_4^+$ -N 30–45, $\text{PO}_4$ -P 5–15                                                  | CaP precipitated in a lab up-flow reactor at 20°C<br><br>CaCl <sub>2</sub> added after the anaerobic stage of a EBPR system and CO <sub>2</sub> stripping                                                                                                                                                           | EBPR in a continuous-flow AS A <sup>2</sup> O system for N & P removal (~300 L)<br><br>Chemical P precipitation                                                                                                                                                                                                                                                                                                | CaP precipitate mostly as HAP (or precursors) according to XRD and SEM-EDS<br><br>Composition of the precipitate: 8–13% P                                                                                                                                                       | [112–113] |

|                                                                                                                                 |                                                                                                                                                                                                                      |                                                                                                                                                                                                                                             |                                                                                                                                               |       |
|---------------------------------------------------------------------------------------------------------------------------------|----------------------------------------------------------------------------------------------------------------------------------------------------------------------------------------------------------------------|---------------------------------------------------------------------------------------------------------------------------------------------------------------------------------------------------------------------------------------------|-----------------------------------------------------------------------------------------------------------------------------------------------|-------|
|                                                                                                                                 | by aeration (5% $\text{NH}_3$ loss), calcite used as seeding material                                                                                                                                                | favoured EBPR (PUE > 99%) regardless COD/P mass ratio (20–67); final effluent with <1 mg $\text{PO}_4\text{-P/L}$                                                                                                                           | Precipitate with Ca/P molar ratio >1.67 due to carbonate co-precipitation; high P release in the anaerobic stage favoured HAP crystallisation |       |
| Side-stream sludge fermenter effluent from an EBPR system treating low-strength synthetic waste water                           | MgP precipitated in batch (in flasks) using MgO at room temperature                                                                                                                                                  | EBPR in a SBR alternating AO phases also involved partial N removal through NDN (NRE 25%)                                                                                                                                                   |                                                                                                                                               |       |
| Composition of synthetic waste water: COD 300, $\text{NH}_4^+\text{-N}$ 30, $\text{PO}_4\text{-P}$ 10                           | Mg/ $\text{NH}_4/\text{PO}_4$ adjusted to 1.5/2.7/1.0                                                                                                                                                                | Fermentation of purged sludge followed by precipitation of the released N and P, plus reintroduction of VFAs formed into EBPR system, lead to higher P separation efficiency (P in the effluent reduced by >65%) and complete nitrification | MgP precipitate mostly as MAP according to supernatant analysis and XRD                                                                       | [114] |
| Swine waste water                                                                                                               | MgP precipitated in a lab CSTR (10 L) at 27°C, MgP precipitate recovered from an external settler                                                                                                                    | NDN in a 2-stage continuous flow intermittently aerated AS system (+ settler) (20 L; air on/off 1/1 h), pH adjusted to that of raw waste water (HCl)                                                                                        | MgP precipitate partly as MAP according to XRD and EDS                                                                                        |       |
| Composition: pH 7.3–7.9, COD 5117–6705, TN 959–1120, $\text{NH}_4^+\text{-N}$ 733–922, TP 106–222, $\text{PO}_4\text{-P}$ 31–56 | Mg/ $\text{NH}_4/\text{PO}_4$ adjusted to 1.0/1.0/1.0 by adding $\text{MgCl}_2$ and $\text{K}_2\text{HPO}_4$ ; pH increased to 9 with NaOH; MgP precipitate partly recycled to the reaction tank as seeding material | COD/TN mass ratio increased from 4.8–6.1 to 13.0–19.8 favouring NDN, COD/TP mass ratio increased from 35–                                                                                                                                   | Anhydrous precipitate with 25.3% P, 18.3% Mg, 7.1% N, 5.4% K, 2.5% Ca                                                                         | [115] |
|                                                                                                                                 |                                                                                                                                                                                                                      |                                                                                                                                                                                                                                             | Quality of the precipitate potentially compromised by the organic content (35 wt% as COD)                                                     |       |

|                                                                                                                                                                        |                                                                                                                                                                                                                   |                                                                                                                                                                                                                                                                                                                                                                                                                     |                                                                                                                                                           |       |
|------------------------------------------------------------------------------------------------------------------------------------------------------------------------|-------------------------------------------------------------------------------------------------------------------------------------------------------------------------------------------------------------------|---------------------------------------------------------------------------------------------------------------------------------------------------------------------------------------------------------------------------------------------------------------------------------------------------------------------------------------------------------------------------------------------------------------------|-----------------------------------------------------------------------------------------------------------------------------------------------------------|-------|
|                                                                                                                                                                        | 78–92% $\text{NH}_4^+$ , 84–93% $\text{PO}_4$ (besides 74% TSS, 47% COD) separated                                                                                                                                | 50 to 267–430 favouring EBPR<br><br>MgP precipitation enhanced nitrification and ARE due to a reduced OLR and NLR once fixed HRT, low $\text{NH}_3$ levels in bioreactors (eventually toxic triggering $\text{NO}_2^-$ accumulation)<br><br>OLR 4.5 g COD $\text{L}^{-1} \text{d}^{-1}$ , NLR 0.18 g N $\text{L}^{-1} \text{d}^{-1} \rightarrow \text{NRE} > 90\%$ ( $\text{NH}_4^+$ )                              |                                                                                                                                                           |       |
| Anaerobically digested landfill leachate<br><br>Composition: pH 7.5–8.1, ALK 11120, $\text{Cl}^-$ 2000, COD 12000, $\text{BOD}_5$ 4250, $\text{NH}_4^+$ -N 2800, TP 14 | MgP precipitated in a lab stirred system using $\text{MgCl}_2$ and $\text{PO}_4$<br><br>$\text{Mg}/\text{NH}_4/\text{PO}_4$ adjusted to 0.7/1.0/0.7, pH 9, reaction time 2 h<br><br>70% $\text{NH}_4^+$ separated | NDN in a SBR (10 L), pH adjusted to 7.5 (influent)<br><br>$\text{BOD}_5/\text{NH}_4^+$ -N mass ratio increased from 1.5 to 6.5 favouring NDN, 6-fold $\text{Cl}^-$ raise (12 g $\text{L}^{-1}$ )<br><br>The higher $\text{MgCl}_2$ addition the higher $\text{NH}_4^+$ separation as MAP, but $\text{Cl}^- > 12 \text{ g L}^{-1}$ limited nitrification (triggering $\text{NH}_4^+$ accumulation in the bioreactor) | Composition of the MgP formed not determined analytically                                                                                                 | [116] |
| Rare-earth smelting waste water<br><br>Composition: pH 0.77, COD 1088, $\text{NH}_4^+$ -N 1540, $\text{La}^{3+}$ 200, $\text{Eu}^{3+}$ 78                              | MgP precipitated in lab batch tests (in beakers) at 20°C<br><br>$\text{Mg}/\text{NH}_4/\text{PO}_4$ adjusted with $\text{MgSO}_4 + \text{Na}_2\text{HPO}_4$ (among other P-sources), pH increased with KOH        | SND in a batch system using immobilised microorganisms<br><br>COD/ $\text{NH}_4^+$ -N mass ratio increased from 0.7 to 7.2 favouring NDN (COD 566, $\text{NH}_4^+$ -N 79, mg $\text{L}^{-1}$ )                                                                                                                                                                                                                      | MgP precipitate mostly assumed as MAP. Composition: 15.6% P, 9.3% N, 8.3% Mg<br><br>Quality of the MgP precipitated compromised by the rare metal content | [117] |



|                                                                                                              |                                                                                                                                                                                   |                                                                                                                      |                                                                                                             |          |
|--------------------------------------------------------------------------------------------------------------|-----------------------------------------------------------------------------------------------------------------------------------------------------------------------------------|----------------------------------------------------------------------------------------------------------------------|-------------------------------------------------------------------------------------------------------------|----------|
|                                                                                                              | Mg/NH <sub>4</sub> /PO <sub>4</sub> adjusted to 1.2/1.0/1.3, pH 11.1–11.2, reaction time 1.5 h                                                                                    | Rare metal ions removed from the liquid phase favouring biological treatment                                         | When Ca dosed instead of Mg, CaP formed hypothesised as Ca-struvite. Composition: 18.3% Ca, 13.6% P, 6.5% N |          |
|                                                                                                              | 95% NH <sub>4</sub> <sup>+</sup> separated                                                                                                                                        | NLR 0.13 g NH <sub>4</sub> <sup>+</sup> -N L <sup>-1</sup> d <sup>-1</sup> , NRE 86% (NH <sub>4</sub> <sup>+</sup> ) |                                                                                                             |          |
|                                                                                                              | Using CaO (not KOH) and Ca <sub>3</sub> (PO <sub>4</sub> ) <sub>2</sub> (not MgSO <sub>4</sub> , Na <sub>2</sub> HPO <sub>4</sub> ) → ~80% NH <sub>4</sub> <sup>+</sup> separated |                                                                                                                      |                                                                                                             |          |
|                                                                                                              | MgP precipitated in lab batch tests (in beakers)                                                                                                                                  | NDN in a fill-and-draw system under intermittent aeration (air on/off 1/1 h)                                         |                                                                                                             |          |
| Raw swine waste water obtained by centrifugation                                                             | Mg/NH <sub>4</sub> /PO <sub>4</sub> adjusted with MgCl <sub>2</sub> + KH <sub>2</sub> PO <sub>4</sub> , pH increased with NaOH                                                    | BOD/TN increased from 1.6 to 7 enhancing NDN (BOD 8200, TN 1166, mg L <sup>-1</sup> )                                | Composition of the MgP not determined analytically                                                          | [66,118] |
| Composition: pH 8.5, BOD 9500, TN 5930, NH <sub>4</sub> <sup>+</sup> -N 2500, TP 360, PO <sub>4</sub> -P 302 | Mg/NH <sub>4</sub> /PO <sub>4</sub> adjusted to 0.9/1.0/0.6, pH 7.5, temperature 25°C, reaction time 1 h                                                                          | NLR 0.97 g N L <sup>-1</sup> d <sup>-1</sup> , NRE 91% w/o detecting TP removal                                      |                                                                                                             |          |
|                                                                                                              | 79–87% NH <sub>4</sub> <sup>+</sup> , 40–88% P separated                                                                                                                          | Additional 60% PO <sub>4</sub> precipitated as CaP by adding CaCl <sub>2</sub> once biotreatment ended               |                                                                                                             |          |
| <b><i>PNA as the bioprocess following chemical P precipitation</i></b>                                       |                                                                                                                                                                                   |                                                                                                                      |                                                                                                             |          |
| Digester sludge thickening lagoon supernatant in a municipal WWTP                                            | MAP precipitated by the Ostara® process at full-scale; PO <sub>4</sub> -P reduced to 32 mg L <sup>-1</sup>                                                                        | PNA in a IFAS-SBR (6 L) with intermittent aeration                                                                   | No data available for the precipitate                                                                       | [69]     |
| Composition: pH 8.0, ALK 3180, TSS 344,                                                                      |                                                                                                                                                                                   | NLR 0.31 g N L <sup>-1</sup> d <sup>-1</sup> , NRE improved from 55% to 88% when PO <sub>4</sub> was decreased       |                                                                                                             |          |

|                                                                                                                                                                                                       |                                                                                                                                                                                                                                                                                                                      |                                                                                                                                                                                                                                                                                          |                                                           |       |
|-------------------------------------------------------------------------------------------------------------------------------------------------------------------------------------------------------|----------------------------------------------------------------------------------------------------------------------------------------------------------------------------------------------------------------------------------------------------------------------------------------------------------------------|------------------------------------------------------------------------------------------------------------------------------------------------------------------------------------------------------------------------------------------------------------------------------------------|-----------------------------------------------------------|-------|
| COD 644, NH <sub>4</sub> <sup>+</sup> -N 892, PO <sub>4</sub> -P 235                                                                                                                                  |                                                                                                                                                                                                                                                                                                                      | High PO <sub>4</sub> inhibited anammox bacteria, higher tolerance to PO <sub>4</sub> stress when biomass grew as biofilm rather than forming flocs                                                                                                                                       |                                                           |       |
| Anaerobically digested sludge dewatering centrate in a municipal WWTP<br><br>Composition: pH 8.0–8.8, TIC 681–893, COD 410–510, NH <sub>4</sub> <sup>+</sup> -N 1081–1177, PO <sub>4</sub> -P 260–351 | MgP precipitated in a lab CSTR (10 L) at 10°C with MgO                                                                                                                                                                                                                                                               | PNA as 2-step process (PO <sub>4</sub> precipitated after PN) and also as 1-step process (with intermittent aeration) using SBRs (3.5 L)                                                                                                                                                 | Composition of the MgP formed not determined analytically | [119] |
|                                                                                                                                                                                                       | Mg/P adjusted to 1, reaction time 2.5 h; PO <sub>4</sub> -P reduced to 31 mg L <sup>-1</sup><br><br>MgP formation (incl. eventual NH <sub>3</sub> stripping) resulted in 8% NH <sub>4</sub> <sup>+</sup> separation                                                                                                  | NRR ~0.3 g N L <sup>-1</sup> d <sup>-1</sup> for both configurations<br><br>45–50% anammox activity drop at ~300 mg P L <sup>-1</sup><br><br>Lower sensitivity to PO <sub>4</sub> -P was estimated in short-term experiments (IC <sub>50</sub> : 650 mg L <sup>-1</sup> at 35°C, pH 6.5) |                                                           |       |
| Anaerobically digested industrial (potato) waste water<br><br>Composition (anaerobic effluent 2-fold diluted): pH 7.9, TIC 396, NH <sub>4</sub> <sup>+</sup> -N 203, PO <sub>4</sub> -P 57, Mg 39     | MgP precipitated in a lab mixed reactor (4 L) with MgCl <sub>2</sub>                                                                                                                                                                                                                                                 | PNA as 2-step process (20 L CSTR w/o sludge retention + 3.7 L UFBR) and also as 1-step process (UFBR) at 35°C                                                                                                                                                                            | MgP precipitate mostly as MAP according to XRD            | [120] |
|                                                                                                                                                                                                       | pH adjusted to 7.8 (NaOH)<br><br>Urea (1.5%) added to the crystallisator as N source (in presence of anaerobic sludge), HRT 6–7 h<br><br>TIC/NH <sub>4</sub> <sup>+</sup> -N decreased from 2.3 to 1.9 favouring PNA (TIC 421, NH <sub>4</sub> <sup>+</sup> -N 261, mg L <sup>-1</sup> ); PUE 83% (PO <sub>4</sub> ) | NLR 0.1–0.25 g N L <sup>-1</sup> d <sup>-1</sup><br><br>Global performance (2-step process): 86% N, 83% PO <sub>4</sub> reduced                                                                                                                                                          |                                                           |       |

|                                                                                                                                                    |                                                                                                                                                                                                                                                                                                                                                                 |                                                                                                                                                                                                                                                                                                                                                                                                                                                                                           |                                                                                                             |           |
|----------------------------------------------------------------------------------------------------------------------------------------------------|-----------------------------------------------------------------------------------------------------------------------------------------------------------------------------------------------------------------------------------------------------------------------------------------------------------------------------------------------------------------|-------------------------------------------------------------------------------------------------------------------------------------------------------------------------------------------------------------------------------------------------------------------------------------------------------------------------------------------------------------------------------------------------------------------------------------------------------------------------------------------|-------------------------------------------------------------------------------------------------------------|-----------|
| Anaerobically digested industrial (potato) waste water from a UASB reactor + anaerobically digested sludge dewatering centrate in a municipal WWTP | MAP precipitated by the PHOSPAQ™ process at full-scale (2*300 m <sup>3</sup> ), aeration supplied for bCOD degradation and CO <sub>2</sub> stripping                                                                                                                                                                                                            | PNA as 1-step process (600 m <sup>3</sup> ) with granular sludge and dynamically controlled continuous aeration at 37°C                                                                                                                                                                                                                                                                                                                                                                   | MAP with low HM content with respect to EU standards for fertilisers                                        |           |
| Composition: COD 565, NH <sub>4</sub> <sup>+</sup> -N 372, PO <sub>4</sub> -P 73                                                                   | MgO dosed and pH adjusted to 8.2–8.3; PUE ~67% (feasible >80%)                                                                                                                                                                                                                                                                                                  | NLR 1.5 g N L <sup>-1</sup> d <sup>-1</sup><br><br>Global performance: ca. 56% COD, 73% TN, 91% NH <sub>4</sub> <sup>+</sup> , 76% TP reduced                                                                                                                                                                                                                                                                                                                                             | Precipitate fertilising effectiveness demonstrated in field tests (= performance as commercial fertilisers) | [121–122] |
| Anaerobically co-digested sludge dewatering supernatant in a municipal WWTP                                                                        | MgP precipitated in a CSTR (50 L) using MgCl <sub>2</sub> or MgCO <sub>3</sub><br><br>Solids >0.8 mm removed before precipitation<br><br>Mg/P adjusted to 1.3, reaction time 24 h; PO <sub>4</sub> -P reduced to 18 mg L <sup>-1</sup><br><br>MgP formation (incl. eventual NH <sub>3</sub> stripping) resulted in 4.5% NH <sub>4</sub> <sup>+</sup> separation | PNA as 2-step process: MBBR (7.4 L) + SBR (30 L)<br><br>PN: NLR 1 g N L <sup>-1</sup> d <sup>-1</sup> , NCE 50% (at 30°C)<br><br>Anammox: PO <sub>4</sub> -P increase from 30 to 55 mg L <sup>-1</sup> implied SAA loss of 45% (in 7 days); by decreasing PO <sub>4</sub> -P to <20 mg L <sup>-1</sup> activity was recovered (SAA ≤100 mg N <sub>2</sub> g <sup>-1</sup> VSS d <sup>-1</sup> , at 35°C); anammox activity was potentially limited at pH 7 and TIC <24 mg L <sup>-1</sup> | Composition of the MgP formed not determined analytically                                                   | [67]      |
| Composition: NH <sub>4</sub> <sup>+</sup> -N 651, PO <sub>4</sub> -P 75                                                                            |                                                                                                                                                                                                                                                                                                                                                                 |                                                                                                                                                                                                                                                                                                                                                                                                                                                                                           |                                                                                                             |           |

Abbreviations: A<sup>2</sup>O, anaerobic-anoxic-oxic; ALK, alkalinity (as CaCO<sub>3</sub>); anammox, anaerobic ammonium oxidation; AO, anaerobic-oxic; AS, activated sludge; BOD, biochemical oxygen demand; CaP, calcium phosphate; COD, chemical oxygen demand (b-, biodegradable; s-, soluble); CSTR, continuous stirred tank reactor; EBPR, enhanced biological P removal; EDS, energy dispersive X-ray spectroscopy; FBR, fluidised bed reactor; HM, heavy metal; HRT, hydraulic residence time; IC<sub>50</sub>, half maximal inhibitory concentration; IFAS, integrated fixed film AS; MAP, magnesium ammonium phosphate; MBR, membrane bioreactor; MBBR, moving bed bioreactor; Me, metal; MFC, microbial fuel cell; MgP, magnesium phosphate; N, nitrogen; NCE, N conversion efficiency; NLR, N loading rate; NDN, nitrification-denitrification; NRE, N removal efficiency; NRR, N removal rate; OLR, organic loading rate; P, phosphorus; PNA, partial nitrification-anammox; PUE, P uptake efficiency; RO, reverse osmosis; SAA, specific anammox activity; SBR, sequencing batch reactor; SEM, scanning electron microscope; SND, simultaneous NDN; TIC, total inorganic carbon; TN, total N; TP, total P; TSS, total suspended solids; UASB, upflow anaerobic sludge blanket; UFBR, upflow fixed bed reactor;

VFA, volatile fatty acids; VSS, volatile suspended solids; WWTP, waste water treatment plant; XRD, X-ray diffraction.

<sup>1</sup> Composition, concentrations expressed in mg L<sup>-1</sup>.

<sup>2</sup> Ca/P, Mg/P and other component ratios expressed in molar units.

**Table S3.** Summary of experiences integrating biological N oxidation, or removal, and mineral precipitation aiming at P recovery inside the bioreactor (concomitant precipitation).

| Waste water source <sup>1</sup>                                                                                                                                                                                        | Experimental conditions                                                                                                                                                                                                                                                                                                                | Bioprocess performance                                                                                                                                                                                                                                                                                                                                                                                                                                                                    | Precipitate characteristics                                                                                                                                                                                                                                                                               | Reference |
|------------------------------------------------------------------------------------------------------------------------------------------------------------------------------------------------------------------------|----------------------------------------------------------------------------------------------------------------------------------------------------------------------------------------------------------------------------------------------------------------------------------------------------------------------------------------|-------------------------------------------------------------------------------------------------------------------------------------------------------------------------------------------------------------------------------------------------------------------------------------------------------------------------------------------------------------------------------------------------------------------------------------------------------------------------------------------|-----------------------------------------------------------------------------------------------------------------------------------------------------------------------------------------------------------------------------------------------------------------------------------------------------------|-----------|
| <i>Nitrification as the bioprocess concomitant to P precipitation</i>                                                                                                                                                  |                                                                                                                                                                                                                                                                                                                                        |                                                                                                                                                                                                                                                                                                                                                                                                                                                                                           |                                                                                                                                                                                                                                                                                                           |           |
| Synthetic urine<br><br>Composition: TN 7780, NH <sub>4</sub> <sup>+</sup> -N 400, PO <sub>4</sub> -P 890                                                                                                               | Long-term nitrification in trickling filters (6 L) partially packed with pumice & mussel shells (CaCO <sub>3</sub> content: ~75 vol%)<br><br>Process at 29°C considering urine solutions at different concentrations<br><br>Urine concentration did not influence filter performance in terms of stability and nitrate production rate | PO <sub>4</sub> precipitation induced by Ca released from mussel shells<br><br>Mussel shells also provided carbonate needed for buffering the system (the higher the concentration of urine the higher the CaP formed and the buffering capacity released)                                                                                                                                                                                                                                | Composition of the CaP formed not determined analytically                                                                                                                                                                                                                                                 | [168]     |
| Synthetic waste water mimicking anaerobic digester dewatering centrate<br><br>Composition: HCO <sub>3</sub> <sup>-</sup> 4700, COD 480, NH <sub>4</sub> <sup>+</sup> -N 470–590, PO <sub>4</sub> -P 100, Mg 45, Ca 115 | PN in aerated SBR (10 L) vs. SBBR (16 L) packed with polyethylene particles<br><br>Process at 30°C and pH 7.5<br><br>Only 25–60% of the TSS as VSS in the SBR (SRT 30 d) and 27–40% in the SBBR (SRT 20 d)                                                                                                                             | SBR: NLR 0.19 g NH <sub>4</sub> <sup>+</sup> -N L <sup>-1</sup> d <sup>-1</sup> and NCE 95%, PLR 0.04 g PO <sub>4</sub> -P L <sup>-1</sup> d <sup>-1</sup> and PUE 40–90% (depending on NH <sub>4</sub> <sup>+</sup> availability within the reactor), faster start-up<br><br>SBBR: NLR 0.35 g NH <sub>4</sub> <sup>+</sup> -N L <sup>-1</sup> d <sup>-1</sup> and NCE 40%, PLR 0.07 g PO <sub>4</sub> -P L <sup>-1</sup> d <sup>-1</sup> and PUE 70%, more stable facing disturbances in | Mineral crystals identified in the sludge when observed at the microscopy<br><br>Suspended solids containing 9–10% P<br><br>Complementary work in the SBR transforming PN into NDN [169] showed (using XRD) that PO <sub>4</sub> precipitated in different form depending on pH (7–8.5): mainly as HAP at | [71]      |

|                                                                       |                                                                                                                                     |                                                                                                                                                                                                                                                                             |                                                                                                                                                               |      |
|-----------------------------------------------------------------------|-------------------------------------------------------------------------------------------------------------------------------------|-----------------------------------------------------------------------------------------------------------------------------------------------------------------------------------------------------------------------------------------------------------------------------|---------------------------------------------------------------------------------------------------------------------------------------------------------------|------|
|                                                                       |                                                                                                                                     | dissolved oxygen conditions                                                                                                                                                                                                                                                 | pH >7.5 and partly as MAP (potentially associated to CaCO <sub>3</sub> ) at pH >8.0                                                                           |      |
| <b>Anammox as the bioprocess concomitant to P precipitation</b>       |                                                                                                                                     |                                                                                                                                                                                                                                                                             |                                                                                                                                                               |      |
|                                                                       |                                                                                                                                     | NLR 5 g NH <sub>4</sub> <sup>+</sup> -N L <sup>-1</sup> d <sup>-1</sup> and NRE 87%;<br>PLR 0.21 g PO <sub>4</sub> -P L <sup>-1</sup> d <sup>-1</sup> and PUE 66%;<br>Granule size 1.3–1.7 mm                                                                               |                                                                                                                                                               |      |
| Synthetic waste water mimicking effluent from a PN reactor            | Anammox process in an EBR with internal recirculation                                                                               | Complementary work [170] in an attached film EBR (35°C) reached NLR 50 g NH <sub>4</sub> <sup>+</sup> -N L <sup>-1</sup> d <sup>-1</sup> and NRE 90% + PLR 0.55 g PO <sub>4</sub> -P L <sup>-1</sup> d <sup>-1</sup> and PUE 72%                                            | CaP recovered as HAP according to chemical analysis of the solid formed (Ca/P molar ratio 1.67)                                                               |      |
|                                                                       | Composition: pH 7.4, TIC 71, NH <sub>4</sub> <sup>+</sup> -N 135, NO <sub>2</sub> <sup>-</sup> -N 178, PO <sub>4</sub> -P 13, Ca 85 | Complementary work [171] in an attached film EBR (35°C) reached NLR 10 g NH <sub>4</sub> <sup>+</sup> -N L <sup>-1</sup> d <sup>-1</sup> and NRE 77% + PLR 0.15 g PO <sub>4</sub> -P L <sup>-1</sup> d <sup>-1</sup> and PUE 68% (CaCl <sub>2</sub> added in recirculation) | Granules with 83% mineral content, 28.9% Ca, 13.4% P, 0.9% N, 0.5% Mg                                                                                         | [72] |
|                                                                       | Reactor (5 L) at 33°C and pH 8.6 with 43.9–70.3 g VSS L <sup>-1</sup> (17% of the TSS)                                              | Complementary work [172] in an EBR (25°C) reached NLR 20 g NH <sub>4</sub> <sup>+</sup> -N L <sup>-1</sup> d <sup>-1</sup> and NRE 84% + PLR 1.32 g PO <sub>4</sub> -P L <sup>-1</sup> d <sup>-1</sup> and PUE 94% (CaCl <sub>2</sub> added in recirculation)               | The core of the granule contained more Ca than the external part (30% vs. 27%) probably due to the formation of CaCO <sub>3</sub> or type-B carbonate apatite |      |
| <b>PNA as the bioprocess concomitant to P precipitation</b>           |                                                                                                                                     |                                                                                                                                                                                                                                                                             |                                                                                                                                                               |      |
| Anaerobically digested sludge dewatering centrate in a municipal WWTP | PNA process as 1-stage                                                                                                              |                                                                                                                                                                                                                                                                             | CaP recovered as HAP according to XRD and chemical analysis of the solid formed (Ca/P molar ratio 1.64)                                                       |      |
|                                                                       | SBR (10 L) at 25°C and pH ~7.2 with 1.45 g VSS L <sup>-1</sup> (62% of the TSS)                                                     | NLR 0.31 g NH <sub>4</sub> <sup>+</sup> -N L <sup>-1</sup> d <sup>-1</sup> and NRE 66%                                                                                                                                                                                      | Granules purged with 71% mineral content,                                                                                                                     | [70] |

|                                                                                                                     |                                                 |                                                                                                                                            |
|---------------------------------------------------------------------------------------------------------------------|-------------------------------------------------|--------------------------------------------------------------------------------------------------------------------------------------------|
| Composition:<br>pH 8.1, ALK<br>4401, NH <sub>4</sub> <sup>+</sup> -N<br>966, PO <sub>4</sub> -P 57,<br>Ca 79, Mg 14 | No addition of<br>chemicals (w/o<br>pH control) | 33.5% Ca, 15.8% P,<br>0.2% Mg<br><br>HMs content complied<br>with EU standards for<br>P fertilisers and<br>requirements from P<br>industry |
|---------------------------------------------------------------------------------------------------------------------|-------------------------------------------------|--------------------------------------------------------------------------------------------------------------------------------------------|

Abbreviations: ALK, alkalinity (as CaCO<sub>3</sub>); anammox, anaerobic ammonium oxidation; COD, chemical oxygen demand; EBR, expanded bed reactor; HAP, hydroxyapatite; HM, heavy metal; N, nitrogen; NCE, N conversion efficiency; NLR, N loading rate; NRE, N removal efficiency; P, phosphorus; PLR, P loading rate; PN, partial nitrification; PNA, PN-anammox; PUE, P uptake efficiency; SBBR, sequencing batch biofilm reactor; SBR, sequencing batch reactor; SRT, solids retention time; TIC: total inorganic carbon; TSS, total suspended solids; VSS, volatile suspended solids; WWTP, waste water treatment plant; XRD, X-ray diffraction.

<sup>1</sup> Composition, concentrations expressed in mg L<sup>-1</sup>.

**Table S4.** Summary of experiences integrating biological N oxidation, or removal, followed by chemical precipitation aiming at P recovery (downstream precipitation).

| Waste water<br>source <sup>1</sup>                                                                                                                                                                                                                  | Bioprocess<br>performance                                                                                                                                                                                                                                                                                                                                                  | Precipitation<br>performance <sup>2</sup>                                                                                                                                                                                                                                              | Precipitate<br>characteristics <sup>2</sup>                                                                                                                                           | Reference |
|-----------------------------------------------------------------------------------------------------------------------------------------------------------------------------------------------------------------------------------------------------|----------------------------------------------------------------------------------------------------------------------------------------------------------------------------------------------------------------------------------------------------------------------------------------------------------------------------------------------------------------------------|----------------------------------------------------------------------------------------------------------------------------------------------------------------------------------------------------------------------------------------------------------------------------------------|---------------------------------------------------------------------------------------------------------------------------------------------------------------------------------------|-----------|
| <i>Nitrification as the bioprocess preceding chemical P precipitation</i>                                                                                                                                                                           |                                                                                                                                                                                                                                                                                                                                                                            |                                                                                                                                                                                                                                                                                        |                                                                                                                                                                                       |           |
| Anaerobically<br>digested swine<br>waste water<br>from a UASB<br>reactor<br><br>Composition:<br>pH 7.6 (7.0),<br>ALK 3231 (428),<br>TOC 636 (154),<br>NH <sub>4</sub> <sup>+</sup> -N 882<br>(160), PO <sub>4</sub> -P 33<br>(98), s-Ca 98<br>(204) | Nitrification in a<br>continuous<br>aerated system at<br>pilot-scale<br><br>Similar tests also<br>conducted<br>considering<br>NDN and PNA<br>as the bioprocess<br>preceding P<br>precipitation<br>(less satisfactory<br>results obtained<br>according to PUE<br>and Ca/P ratio);<br>as far as ALK<br>availability<br>increased P<br>content in<br>precipitate<br>decreased | CaP precipitated in<br>lab batch tests (in<br>beakers) using<br>hydrated lime [10%<br>Ca(OH) <sub>2</sub> ]<br><br>Lime injected<br>under stirring up to<br>pH 9 (24 h settling);<br>PUE >90% (PO <sub>4</sub> )<br>with Ca/P 2<br><br>Similar results<br>previously given in<br>[205] | Field tests under<br>equivalent conditions<br>also performed; sludge<br>formed contained<br>30.0% Ca, 5.7% P, 2.5%<br>Mg; the high Ca/P<br>ratio (~4.6) indicated<br>co-precipitation | [74]      |
| Anaerobically<br>digested<br>industrial<br>(potato) waste<br>water from a<br>UASB reactor                                                                                                                                                           | Nitrification in<br>an aerated CSTR<br>(3.6 L + settler)<br>with NCR 0.26 g<br>NH <sub>4</sub> <sup>+</sup> -N L <sup>-1</sup> d <sup>-1</sup>                                                                                                                                                                                                                             | CaP precipitated in<br>a lab CSTR (3.6 L +<br>settler) with CaCl <sub>2</sub> ;<br>pH 7.8–10.5 and<br>Ca/P 0.7–1.5; tests<br>at room<br>temperature                                                                                                                                    | CaP precipitated<br>mostly as HAP<br>according to XRD and<br>chemical analysis of<br>the solid formed                                                                                 | [206]     |

|                                                                                                                                                                                                                                                                                                                                                                                                     |                                                                                                                                                                                                                                                              |                                                                                                                                                                                                                                                                                                                                                                                                                                                                                                                                                                                                                         |                                                                                                                                                                                                                                                                                                                                          |
|-----------------------------------------------------------------------------------------------------------------------------------------------------------------------------------------------------------------------------------------------------------------------------------------------------------------------------------------------------------------------------------------------------|--------------------------------------------------------------------------------------------------------------------------------------------------------------------------------------------------------------------------------------------------------------|-------------------------------------------------------------------------------------------------------------------------------------------------------------------------------------------------------------------------------------------------------------------------------------------------------------------------------------------------------------------------------------------------------------------------------------------------------------------------------------------------------------------------------------------------------------------------------------------------------------------------|------------------------------------------------------------------------------------------------------------------------------------------------------------------------------------------------------------------------------------------------------------------------------------------------------------------------------------------|
| <p>Composition:<br/>pH 8.1 (7.9),<br/>TIC 587 (77),<br/>NH<sub>4</sub><sup>+</sup>-N 293 (9),<br/>NO<sub>3</sub><sup>-</sup>-N 0 (304),<br/>PO<sub>4</sub>-P 50 (55),<br/>Mg 30 (29), Ca<br/>47 (46), K 1213<br/>(1239)</p>                                                                                                                                                                         |                                                                                                                                                                                                                                                              | <p>PUE 70% PO<sub>4</sub> at<br/>pH 7.8 with CaP<br/>yield depending on<br/>Ca ions availability;<br/>high pH and Ca/P<br/>initiated co-<br/>precipitation of<br/>carbonates and<br/>MgP</p> <p>Nitrification<br/>reduced Ca(HCO<sub>3</sub>)<sub>2</sub><br/>inhibition and<br/>carbonate<br/>precipitation<br/>making Ca<br/>available for CaP<br/>precipitation</p>                                                                                                                                                                                                                                                  | <p>Composition: Ca/P/Mg<br/>ratio as 1.5/1.0/0.1</p>                                                                                                                                                                                                                                                                                     |
|                                                                                                                                                                                                                                                                                                                                                                                                     |                                                                                                                                                                                                                                                              | <p>CaP precipitated in<br/>lab batch tests (in<br/>beakers), 1 h<br/>reaction time</p>                                                                                                                                                                                                                                                                                                                                                                                                                                                                                                                                  |                                                                                                                                                                                                                                                                                                                                          |
| <p>Anaerobically<br/>digested<br/>industrial<br/>(potato) waste<br/>water<br/>previously<br/>processed for<br/>urease-induced<br/>partial<br/>phosphate<br/>removal</p> <p>Composition:<br/>pH 7.5 (8.5),<br/>TIC 455 (32),<br/>NH<sub>4</sub><sup>+</sup>-N 180 (0),<br/>NO<sub>3</sub><sup>-</sup>-N 0 (180),<br/>PO<sub>4</sub>-P 36 (12),<br/>Mg 43 (115), Ca<br/>121 (74), K 997<br/>(997)</p> | <p>Nitrification in<br/>an aerated MBR<br/>(25 L)</p> <p>Mg content and<br/>pH increased<br/>due to<br/>preliminary<br/>ureolytic<br/>phosphate<br/>removal</p> <p>Ca/P molar ratio<br/>increased from<br/>2.6 to 4.8 (66%<br/>PO<sub>4</sub> reduction)</p> | <p>Several chemicals<br/>used (NaOH,<br/>Ca(OH)<sub>2</sub>, Na<sub>2</sub>CO<sub>3</sub>)<br/>to raise pH (8.5–<br/>9.0) and test effect<br/>of TIC</p> <p>TIC decrease due<br/>to nitrification<br/>(&gt;90%) implied<br/>shorter dosage of<br/>NaOH for raising<br/>the pH; NaOH<br/>supply w/o<br/>nitrification may<br/>lead to MgP &amp;<br/>CaCO<sub>3</sub> formation</p> <p>pH increase with<br/>Ca(OH)<sub>2</sub> favoured<br/>PO<sub>4</sub> precipitation<br/>due to extra Ca<br/>dosage</p> <p>pH increase with<br/>Na<sub>2</sub>CO<sub>3</sub> hampered<br/>Ca and PO<sub>4</sub><br/>precipitation</p> | <p>Composition of the<br/>precipitate not<br/>determined<br/>analytically</p> <p>Similar results than in<br/>[207] where P uptake<br/>was assessed as a<br/>function of reaction<br/>time, pH, Ca/P and<br/>presence of<br/>competitive ions;<br/>optimal TIC/NH<sub>4</sub><sup>+</sup><br/>molar ratio before<br/>nitrification ~2</p> |

[124]

|                                                                        |                                                                                                                                                                                                                                                                                                                                                              |                                                                                                                                                                                                                                                                                                                                                                                                                                                                                                 |                                                                                                                                                                                                                                                                                                                                                                                  |       |
|------------------------------------------------------------------------|--------------------------------------------------------------------------------------------------------------------------------------------------------------------------------------------------------------------------------------------------------------------------------------------------------------------------------------------------------------|-------------------------------------------------------------------------------------------------------------------------------------------------------------------------------------------------------------------------------------------------------------------------------------------------------------------------------------------------------------------------------------------------------------------------------------------------------------------------------------------------|----------------------------------------------------------------------------------------------------------------------------------------------------------------------------------------------------------------------------------------------------------------------------------------------------------------------------------------------------------------------------------|-------|
| Surface lagoon liquids from swine farms                                | <p>Nitrification in fluidised bed reactors (1.2 L) with sludge immobilised in supporting porous medium (3–5 mm cubes) at 30°C with NCR 0.26 g <math>\text{NH}_4^+\text{-N L}^{-1} \text{ d}^{-1}</math></p> <p>Ca/P molar ratio of 0.3–2.7 for the influent waste water</p> <p>&gt;90% ALK reduction and prevention of <math>\text{NH}_3</math> emission</p> | <p>CaP precipitated in lab batch tests (in glass tubes), 1 min mixing</p> <p>pH 6–12 and Ca/P 1–10 tested; <math>\text{Ca(OH)}_2</math> added as precipitant (hydrated lime suspended in water)</p> <p>pH increased to <math>\geq 9.5</math> for optimum P precipitation; PUE &gt;90% TP</p> <p>Similar field test in [73] (reactor vol. 379 L, hydrated lime injected after nitrification until pH 9.0–10.5); P in effluent adjustable for on-farm use according to crop needs (N/P ratio)</p> | <p>Composition of the precipitate: 2.5–10% P; nitrification favoured P availability in the precipitate; the recovered material can be exported from the farm and reused as P-fertiliser</p> <p>The high pH value applied in the precipitation process destroys pathogens</p> <p>For the field test [73] composition of the precipitate was 24.6% Ca, 6.9% P, 1.2% Mg, 0.5% K</p> | [208] |
| <b><i>NDN as the bioprocess preceding chemical P precipitation</i></b> |                                                                                                                                                                                                                                                                                                                                                              |                                                                                                                                                                                                                                                                                                                                                                                                                                                                                                 |                                                                                                                                                                                                                                                                                                                                                                                  |       |
| Fertiliser industry waste water                                        | <p>NDN in a continuous flow AS AO system at pilot-scale (760 L)</p> <p>NLR 0.6–1.3 g N <math>\text{L}^{-1} \text{ d}^{-1}</math>; nitrification partially inhibited; denitrification achieved by adding methanol</p>                                                                                                                                         | <p>MgP precipitated in a continuous pilot-scale unit (320 L + settler); NLR 48–72 g N <math>\text{L}^{-1} \text{ d}^{-1}</math></p> <p>Mg/<math>\text{NH}_4/\text{PO}_4</math> adjusted to 1.5–1.8/1.0/1.5–1.8 with <math>\text{MgCl}_2 + \text{H}_3\text{PO}_4</math>; pH 11–12 (NaOH)</p> <p>Mg and <math>\text{PO}_4</math> recovered from the precipitate by heating (while <math>\text{NH}_3</math> stripped out) allowing the recycling within the process (&gt;90 wt%)</p>               | <p>Composition of the precipitate after drying: 24.0% P, 16.6% Mg, 1.1% N</p>                                                                                                                                                                                                                                                                                                    | [209] |



|                                                                                                                                                                                                                                                                                                                                                                             |                                                                                                                                                        |                                                                                                                                                                                  |                                                                                                                          |
|-----------------------------------------------------------------------------------------------------------------------------------------------------------------------------------------------------------------------------------------------------------------------------------------------------------------------------------------------------------------------------|--------------------------------------------------------------------------------------------------------------------------------------------------------|----------------------------------------------------------------------------------------------------------------------------------------------------------------------------------|--------------------------------------------------------------------------------------------------------------------------|
| Residual PO <sub>4</sub><br>removed from the<br>water line<br>electrochemically                                                                                                                                                                                                                                                                                             |                                                                                                                                                        |                                                                                                                                                                                  |                                                                                                                          |
| Global<br>performance: 88%<br>TN, 87% NH <sub>4</sub> <sup>+</sup> , 92%<br>NO <sub>3</sub> <sup>-</sup> reduction                                                                                                                                                                                                                                                          |                                                                                                                                                        |                                                                                                                                                                                  |                                                                                                                          |
| Subfloor slurry<br>from a pig<br>farm, liquid<br>separated by a<br>rotary press                                                                                                                                                                                                                                                                                             | NDN in a<br>continuous flow<br>AS AO system at<br>full-scale (504-<br>m <sup>3</sup> )                                                                 | CaP precipitated in<br>a continuous full-<br>scale unit, well-<br>mixed and with<br>conical bottom (300<br>L); hydrated lime<br>[12% Ca(OH) <sub>2</sub> ]<br>injected to pH 9.5 | Composition of the<br>precipitate not<br>determined<br>analytically                                                      |
| Composition:<br>pH 7.8 (8.0),<br>ALK 5469<br>(1422), TSS 1254<br>(227), NH <sub>4</sub> <sup>+</sup> -N<br>1213 (124), NO <sub>3</sub> <sup>-</sup> -<br>N 0 (221), PO <sub>4</sub> <sup>-</sup><br>P 82 (76), Mg 44<br>(16), Ca 106<br>(39), K 1551<br>(1420)                                                                                                              | Influent waste<br>water with Ca/P<br>molar ratio 0.4<br><br>74% ALK, 87%<br>COD, 90% NH <sub>4</sub> <sup>+</sup> ,<br>7% PO <sub>4</sub><br>reduction | PUE 75% PO <sub>4</sub>                                                                                                                                                          | 0.67 and 0.39 log <sub>10</sub><br>reductions for total<br>faecal coliforms and<br>enterococci,<br>respectively          |
| [99]                                                                                                                                                                                                                                                                                                                                                                        |                                                                                                                                                        |                                                                                                                                                                                  |                                                                                                                          |
| MPP precipitated<br>in:                                                                                                                                                                                                                                                                                                                                                     |                                                                                                                                                        |                                                                                                                                                                                  |                                                                                                                          |
| (1) lab experiments<br>lasting 2–3 h at<br>room temperature<br>(2) pilot plant<br>running as CSTR<br>(2-m <sup>3</sup> + settler);<br>MgO added as Mg<br>source; reaction<br>time 0.5 h; TSS may<br>interfere if >1 g L <sup>-1</sup><br>(3) full-scale plant<br>(3 CSTRs + settler);<br>MgO added as Mg<br>source achieving<br><30 mg P L <sup>-1</sup> in the<br>effluent |                                                                                                                                                        |                                                                                                                                                                                  |                                                                                                                          |
| Calf manure                                                                                                                                                                                                                                                                                                                                                                 | NDN running at<br>full-scale                                                                                                                           |                                                                                                                                                                                  | Lab: Fine-grained<br>elongated crystals with<br>a maximum diameter<br>of several tens of<br>microns                      |
|                                                                                                                                                                                                                                                                                                                                                                             |                                                                                                                                                        |                                                                                                                                                                                  | Pilot-plant: the<br>recovered product<br>contained 12.5% P,<br>10.7% Mg, 11.4% K,<br>1.3% Ca, 0.7% N (5.5%<br>organic-C) |
| [210]                                                                                                                                                                                                                                                                                                                                                                       |                                                                                                                                                        |                                                                                                                                                                                  |                                                                                                                          |
| <b>PNA as the bioprocess preceding chemical P precipitation</b>                                                                                                                                                                                                                                                                                                             |                                                                                                                                                        |                                                                                                                                                                                  |                                                                                                                          |
| Anaerobically<br>digested sludge<br>dewatering<br>centrate from<br>two municipal<br>WWTPs –with<br>chemical vs.                                                                                                                                                                                                                                                             | PNA as 1-step<br>process at lab-<br>(10 L) and pilot-<br>scale<br><br>Centrate with 59<br>(chemical) vs.                                               | MgP precipitated<br>in lab batch tests<br>(in beakers)<br><br>pH 8–12 (adjusted<br>with NaOH), Mg/P<br>0.75–1.75, (adjusted                                                      | MgP precipitated as<br>MAP & MPP<br>according to XRD and<br>chemical analysis                                            |
|                                                                                                                                                                                                                                                                                                                                                                             |                                                                                                                                                        |                                                                                                                                                                                  | At pH 11, precipitate<br>composition: 11.4% P,                                                                           |
| [76]                                                                                                                                                                                                                                                                                                                                                                        |                                                                                                                                                        |                                                                                                                                                                                  |                                                                                                                          |

|                                                                                                                                                                                                          |                                                                                                 |                                                                                                                                          |                                                                                                                                                                                                                                                   |
|----------------------------------------------------------------------------------------------------------------------------------------------------------------------------------------------------------|-------------------------------------------------------------------------------------------------|------------------------------------------------------------------------------------------------------------------------------------------|---------------------------------------------------------------------------------------------------------------------------------------------------------------------------------------------------------------------------------------------------|
| biological P removal in the mainstream–                                                                                                                                                                  | 222 (biological) mg PO <sub>4</sub> -P L <sup>-1</sup> ; Mg/K/P molar ratio: 0.02–0.3/1.2–3.9/1 | with MgCl) and temperature 20–40°C                                                                                                       | 9.2% Mg, 4.3% K, 3.5% N, 0.9% Ca                                                                                                                                                                                                                  |
| Composition: pH 7.8–8.0 (7.5–7.7), ALK 3276–3407 (327–752), NH <sub>4</sub> <sup>+</sup> -N 949–963 (109–228), PO <sub>4</sub> -P 59–222 (53–233), Mg 4–12 (4–14), Ca 21–54 (21–33), K 251–327 (261–367) | Ca. 90% ALK, 85% NH <sub>4</sub> <sup>+</sup> reduction                                         | K uptake from water line positively correlated with the pH value up to pH 11                                                             |                                                                                                                                                                                                                                                   |
| Anaerobically digested manure centrate                                                                                                                                                                   | After biological treatment, Mg/K/P molar ratio adjusted to ca. 2.0/4.5/1.0                      | MgP precipitated in lab batch tests (in beakers) targeting MPP recovery                                                                  | MgP precipitated mostly as MPP with co-precipitation of other salts according to XRD                                                                                                                                                              |
| Composition: TSS (500), NH <sub>4</sub> <sup>+</sup> -N (8), PO <sub>4</sub> -P (108), Mg (163), Ca (36), K (609)                                                                                        |                                                                                                 | Different dilutions rates (0–90%) tested to decrease interference by TSS (K and PO <sub>4</sub> adjusted using chemicals); pH 9–12, 38°C | High dilution (90%) favoured co-precipitation of Mg <sub>3</sub> (PO <sub>4</sub> ) <sub>2</sub> and Mg(OH) <sub>2</sub> ; low dilution (0–50%) favoured recovery of all PO <sub>4</sub> as MPP, but with co-precipitation of Mg(OH) <sub>2</sub> |
|                                                                                                                                                                                                          |                                                                                                 | Up to 80% PO <sub>4</sub> recovery at pH 10 and 90% dilution                                                                             | Suspended particles acted as nuclei for heterogeneous nucleation favouring aggregation of crystals as star-asterisk forms                                                                                                                         |

[75]

Abbreviations: ALK, alkalinity (as CaCO<sub>3</sub>); anammox, anaerobic ammonium oxidation; AO, anoxic-oxic; AS, activated sludge; CaP, calcium phosphate; CSTR, continuous stirred tank reactor; HAP, hydroxyapatite; MAP, magnesium ammonium phosphate; MBR, membrane bioreactor; MgP, magnesium phosphate; MPP, magnesium potassium phosphate; N, nitrogen; NCR, N conversion rate; NDN, nitrification-denitrification; P, phosphorus; PNA, partial nitrification-anammox; PUE: P uptake efficiency; TIC, total inorganic carbon; TOC, total organic carbon; TP, total P; TSS, total suspended solids; UASB, upflow anaerobic sludge blanket; WWTP, waste water treatment plant; XRD, X-ray diffraction.

<sup>1</sup> Composition, concentrations expressed in mg L<sup>-1</sup>; values after biological N treatment in brackets.

<sup>2</sup> Ca/P, Mg/P and other component ratios expressed in molar units.

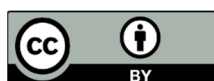

Supplement: s1 [file s1]
